# Supplementary material for: Six [Tp*WS3Cu2]-based clusters derived from [Et4N][Tp*WS3], Cu(i) salts and phosphine ligands: syntheses, structures and enhanced third-order NLO properties
Source: Royal Society of Chemistry journal article supplement (doi:10.1039/c3dt53320d), 2014-01-01
Supplement: c3dt53320d.pdf [file c3dt53320d.pdf]

## Electronic Supplementary Information

### **Six [Tp\*WS<sub>3</sub>Cu<sub>2</sub>]-based clusters derived from [Et<sub>4</sub>N][Tp\*WS<sub>3</sub>], Cu(I) salts and phosphine ligands: syntheses, structures and enhanced third-order NLO properties**

Li-Kuan Zhou,<sup>a,b</sup> Quan Liu,<sup>a</sup> Xin Zhao,<sup>a</sup> Fei-Long Hu,<sup>a</sup> Shu-Chen Liu,<sup>a</sup> Zhi-Gang Ren,<sup>\*a,c</sup> Zhen-Rong Sun,<sup>d</sup> and Jian-Ping Lang<sup>\*a,b</sup>

<sup>a</sup> College of Chemistry, Chemical Engineering and Materials Science, Soochow University, Suzhou 215123, People's Republic of China. Fax: +86 512 65882865; Tel: +86 512 65882865; E-mail: [jplang@suda.edu.cn](mailto:jplang@suda.edu.cn)

<sup>b</sup> State Key Laboratory of Organometallic Chemistry, Shanghai Institute of Organic Chemistry, Chinese Academy of Sciences, Shanghai 200032, People's Republic of China

<sup>c</sup> Department of Physics, East China Normal University, Shanghai 200062, People's Republic of China

## Contents

**Figure S1.** (a) The positive-ion ESI mass spectrum of **2**. (b) The positive-ion ESI mass spectrum of **3**. (c) The positive-ion ESI mass spectrum of **4**. (d) The positive-ion ESI mass spectrum of **5**. (e) The positive-ion ESI mass spectrum of **6**. (e) The positive-ion ESI mass spectrum of **7**.……………S3

**Figure S2.** (a) The calculated isotope pattern (top) and the positive-ion ESI mass spectrum (bellow) of the  $[\text{Tp}^*\text{WS}_3\text{Cu}_2(\text{dppm})_2]^+$  cation of **3**. (b) The calculated isotope pattern (top) and the positive-ion ESI mass spectrum (bellow) of the  $[\text{Tp}^*\text{WS}_3\text{Cu}_2(\text{dppps})]^+$  cation of **4**. (c) The calculated isotope pattern (top) and the positive-ion ESI mass spectrum (bellow) of the  $[\text{Tp}^*\text{WS}_3\text{Cu}_2(\text{bdppmapy})]^+$  cation of **5**. (d) The calculated isotope pattern (top) and the positive-ion ESI mass spectrum (bellow) of the  $\{[\text{Tp}^*\text{WS}_3\text{Cu}_2]_2(\text{dppps})\}^{2+}$  dication of **7**.……………S6

**Figure S3.** View of the cluster dication of **6** with a labelling scheme and 50% thermal ellipsoids. All H atoms were omitted for clarity.……………S7

**Figure S4.** (a) The DFWM signal for the DMF solutions of  $6 \times 10^{-5}$  M for **3**. (b) The DFWM signal for the DMF solutions of  $6 \times 10^{-5}$  M for **4**. (c) The DFWM signal for the DMF solutions of  $6 \times 10^{-5}$  M for **5**. (d) The DFWM signal for the DMF solutions of  $6 \times 10^{-5}$  M for **6**. (a) The DFWM signal for the DMF solutions of  $6 \times 10^{-5}$  M for **7** with 80 fs and 1.5 mm cell. The black solid squares are experimental data, and the red solid curves are the theoretical fit.……………S8

|               |        |             |        |                 |              |                        |               |
|---------------|--------|-------------|--------|-----------------|--------------|------------------------|---------------|
| Sample Name   | 1      | Position    | Vial 1 | Instrument Name | Instrument 1 | User Name              |               |
| Inj Vol       | 0      | InjPosition |        | SampleType      | Sample       | IRM Calibration Status | Success       |
| Data Filename | 1-01.d | ACQ Method  |        | Comment         |              | Acquired Time          | 2013/10/28 10 |

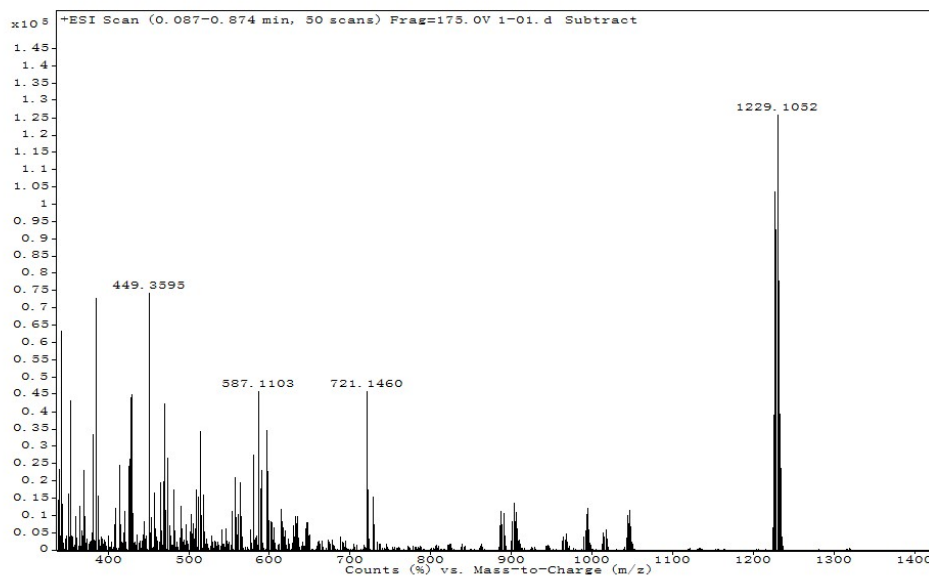

(a)

|               |        |             |        |                 |              |                        |               |
|---------------|--------|-------------|--------|-----------------|--------------|------------------------|---------------|
| Sample Name   | 2      | Position    | Vial 1 | Instrument Name | Instrument 1 | User Name              |               |
| Inj Vol       | 0      | InjPosition |        | SampleType      | Sample       | IRM Calibration Status | Success       |
| Data Filename | 2-01.d | ACQ Method  |        | Comment         |              | Acquired Time          | 2013/10/28 10 |

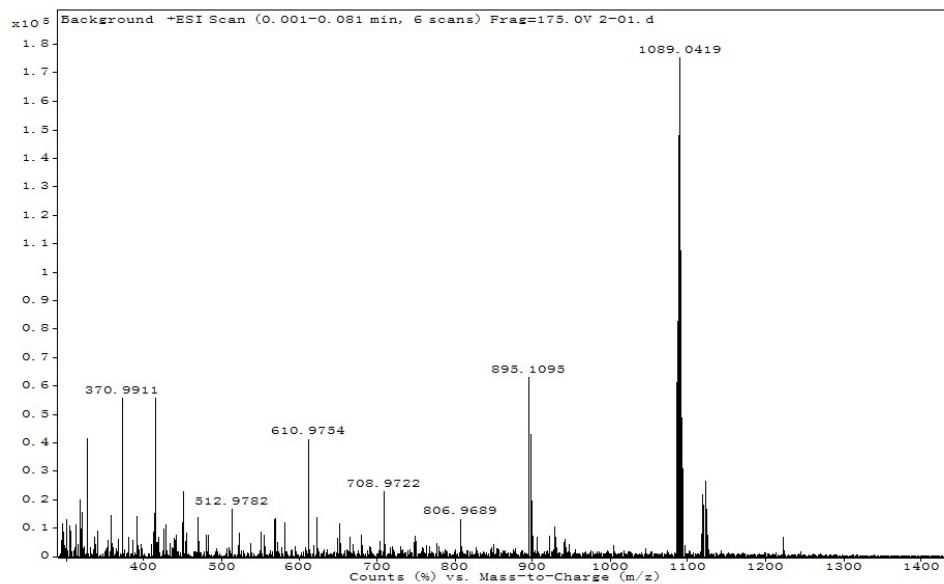

(b)

|               |        |             |        |                 |              |                        |               |
|---------------|--------|-------------|--------|-----------------|--------------|------------------------|---------------|
| Sample Name   | 3      | Position    | Vial 1 | Instrument Name | Instrument 1 | User Name              |               |
| Inj Vol       | 0      | InjPosition |        | SampleType      | Sample       | IRM Calibration Status | Success       |
| Data Filename | 3-01.d | ACQ Method  |        | Comment         |              | Acquired Time          | 2013/10/28 10 |

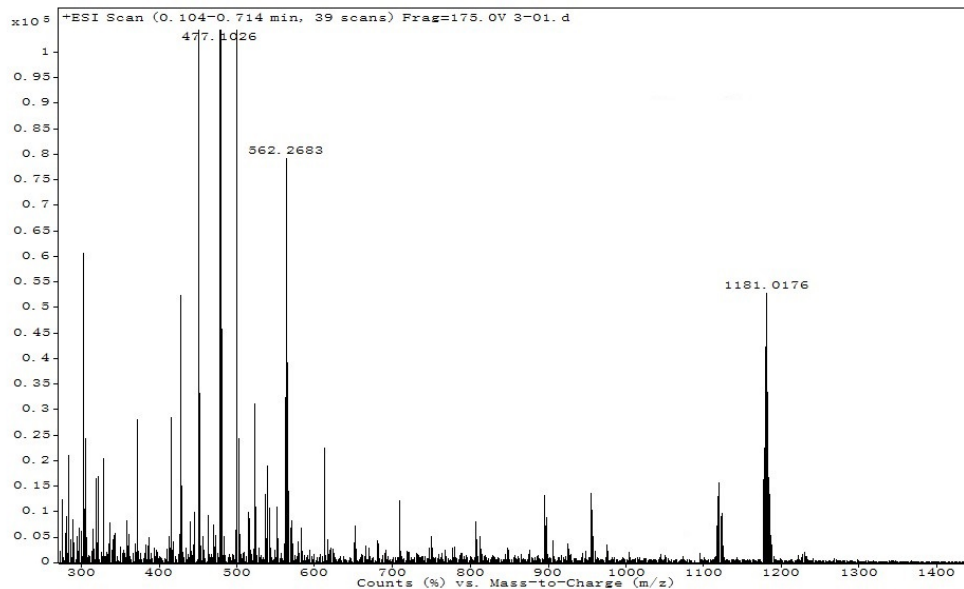

(c)

|               |        |             |        |                 |              |                        |               |
|---------------|--------|-------------|--------|-----------------|--------------|------------------------|---------------|
| Sample Name   | 4      | Position    | Vial 1 | Instrument Name | Instrument 1 | User Name              |               |
| Inj Vol       | 0      | InjPosition |        | SampleType      | Sample       | IRM Calibration Status | Success       |
| Data Filename | 4-01.d | ACQ Method  |        | Comment         |              | Acquired Time          | 2013/10/28 10 |

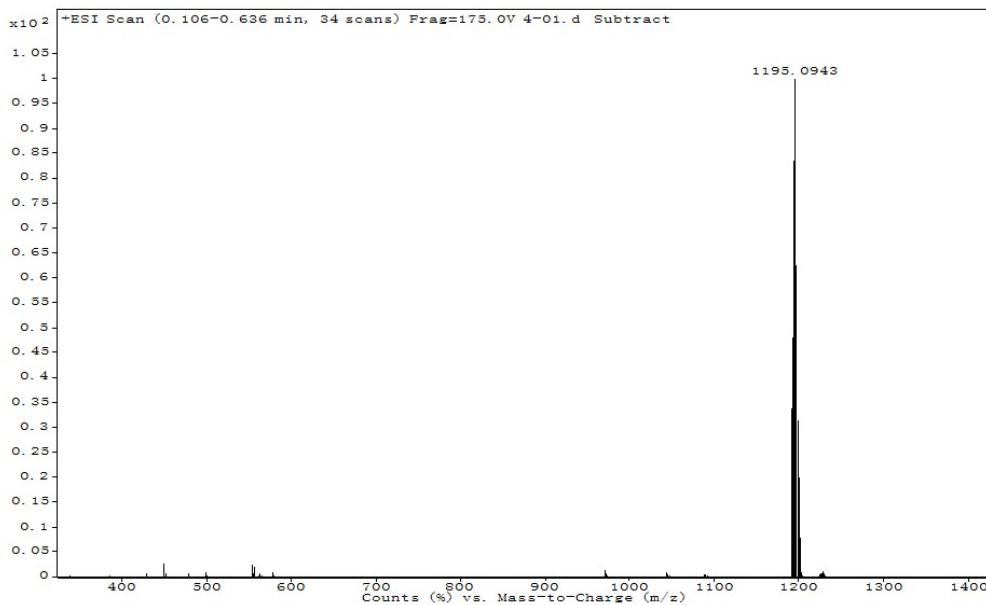

(d)

|               |        |              |        |                 |              |                        |               |
|---------------|--------|--------------|--------|-----------------|--------------|------------------------|---------------|
| Sample Name   | 5      | Position     | Vial 1 | Instrument Name | Instrument 1 | User Name              |               |
| Inj Vol       | 0      | Inj Position |        | Sample Type     | Sample       | IRM Calibration Status | Success       |
| Data Filename | 5-01.d | ACQ Method   |        | Comment         |              | Acquired Time          | 2013/10/28 10 |

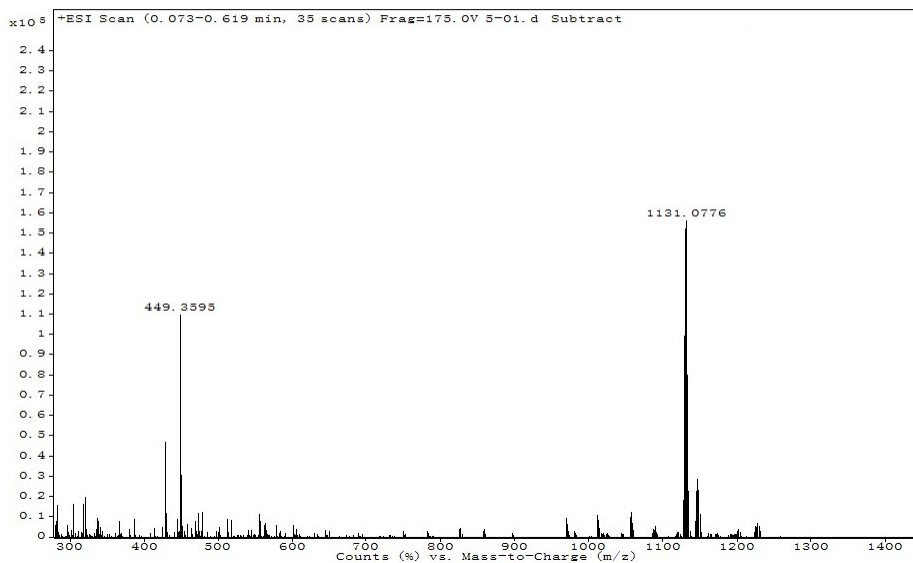

(e)

|               |        |              |        |                 |              |                        |               |
|---------------|--------|--------------|--------|-----------------|--------------|------------------------|---------------|
| Sample Name   | 6      | Position     | Vial 1 | Instrument Name | Instrument 1 | User Name              |               |
| Inj Vol       | 0      | Inj Position |        | Sample Type     | Sample       | IRM Calibration Status | Success       |
| Data Filename | 6-01.d | ACQ Method   |        | Comment         |              | Acquired Time          | 2013/10/28 10 |

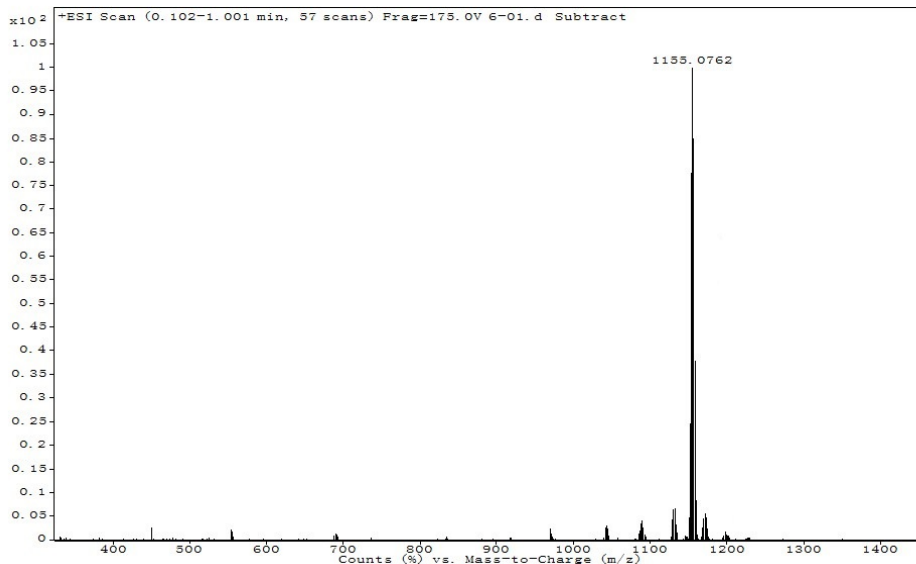

(f)

**Figure S1.** (a) The positive-ion ESI mass spectrum of **2**. (b) The positive-ion ESI mass spectrum of **3**. (c) The positive-ion ESI mass spectrum of **4**. (d) The positive-ion ESI mass spectrum of **5**. (e) The positive-ion ESI mass spectrum of **6**. (f) The positive-ion ESI mass spectrum of **7**.

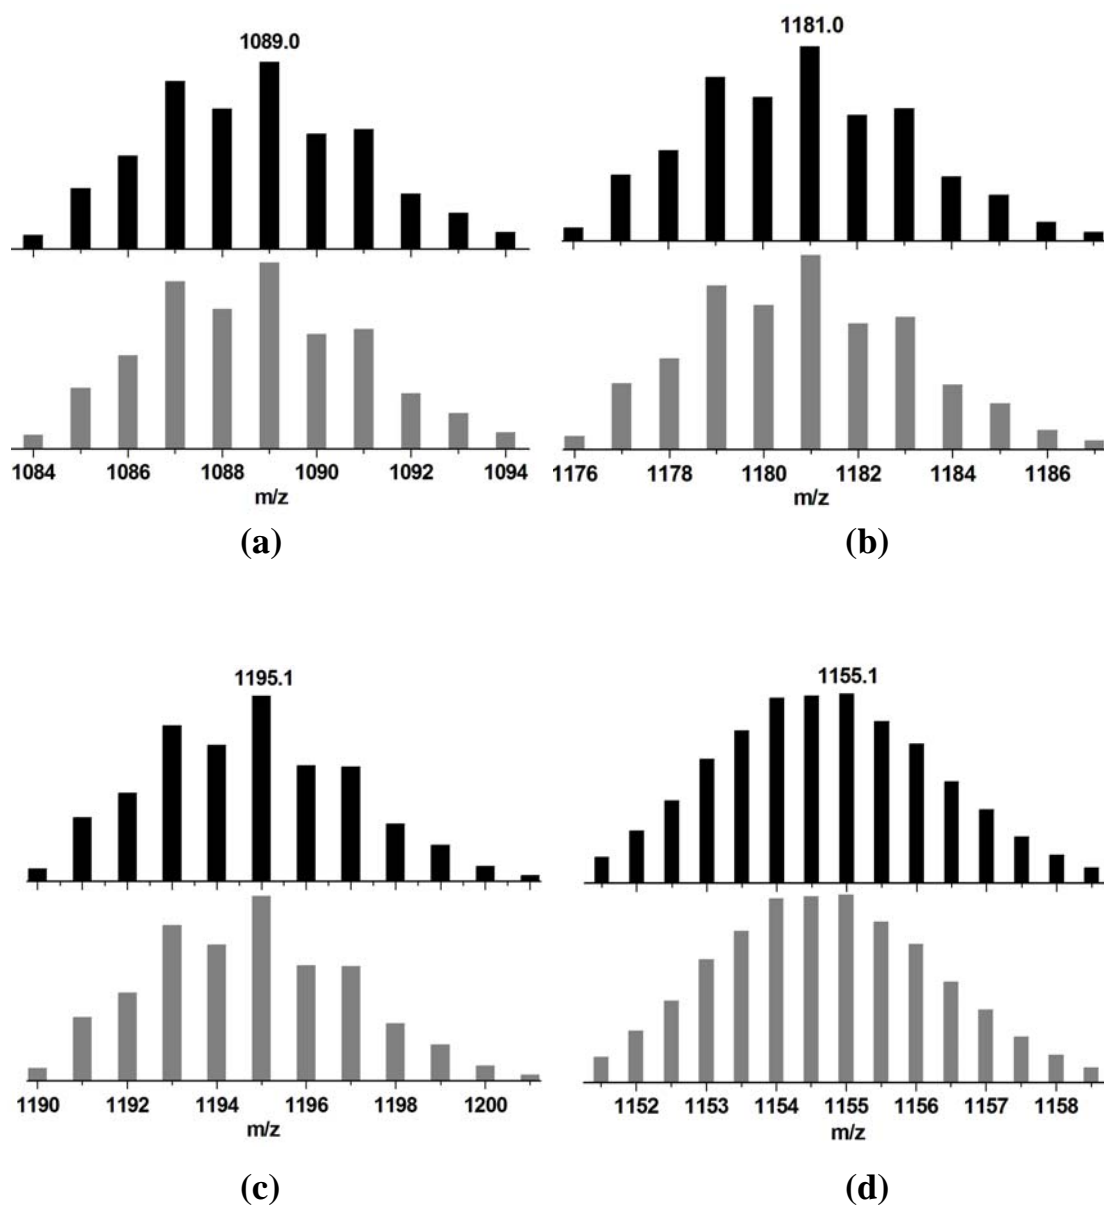

**Figure S2.** (a) The calculated isotope pattern (top) and the positive-ion ESI mass spectrum (bellow) of the  $[\text{Tp}^*\text{WS}_3\text{Cu}_2(\text{dppm})]^+$  cation of **3**. (b) The calculated isotope pattern (top) and the positive-ion ESI mass spectrum (bellow) of the  $[\text{Tp}^*\text{WS}_3\text{Cu}_2(\text{dppps})]^+$  cation of **4**. (c) The calculated isotope pattern (top) and the positive-ion ESI mass spectrum (bellow) of the  $[\text{Tp}^*\text{WS}_3\text{Cu}_2(\text{bdppmapy})]^+$  cation of **5**. (d) The calculated isotope pattern (top) and the positive-ion ESI mass spectrum (bellow) of the  $\{[\text{Tp}^*\text{WS}_3\text{Cu}_2]_2(\text{dpppda})\}^{2+}$  dication of **7**.

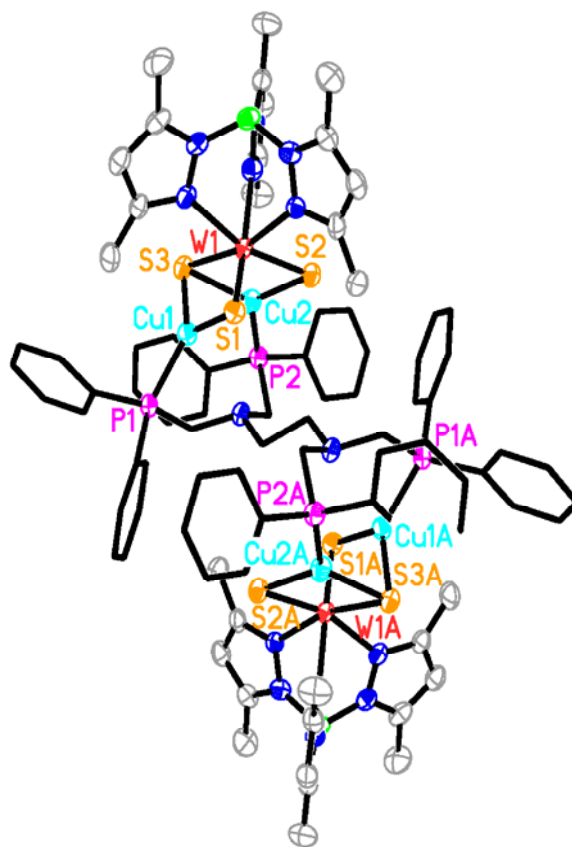

**Figure S3.** View of the cluster dication of **6** with a labelling scheme and 50% thermal ellipsoids. All H atoms were omitted for clarity.

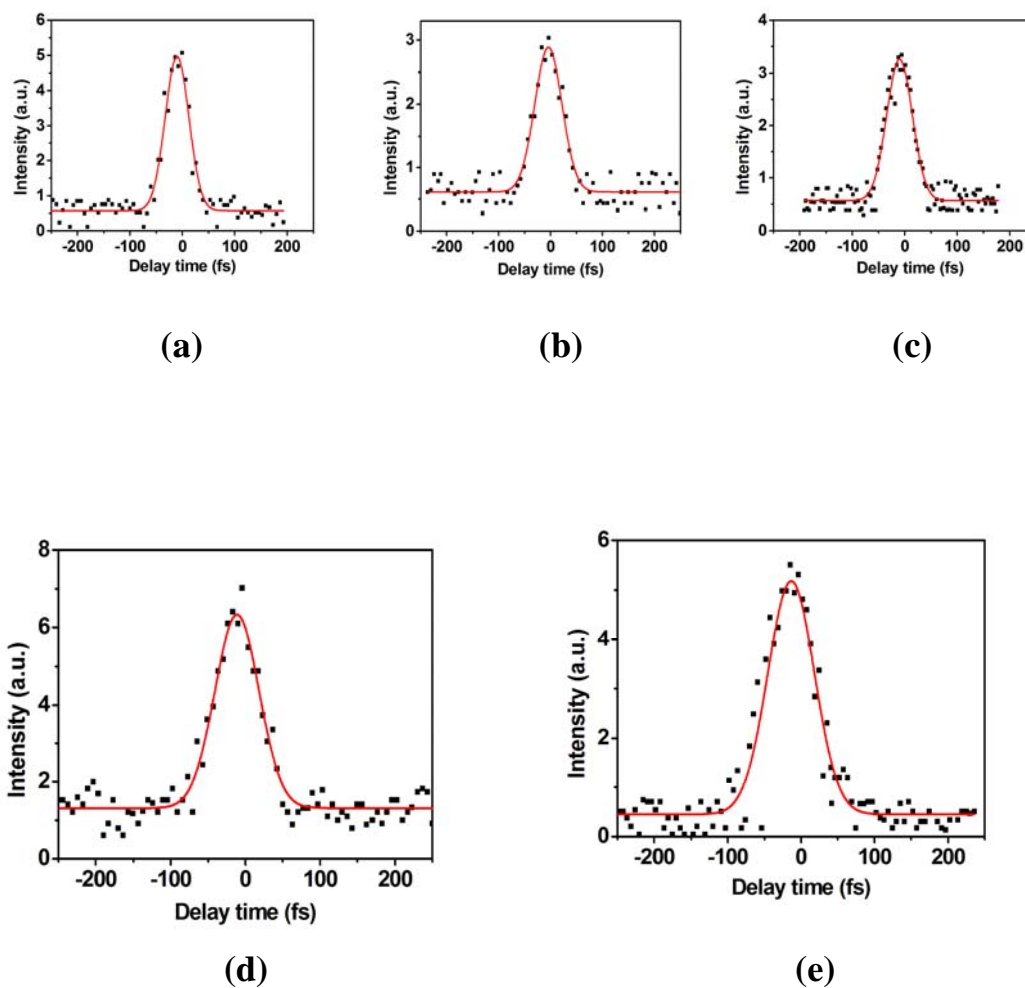

**Figure S4.** (a) The DFWM signal for the DMF solutions of  $6 \times 10^{-5}$  M for **3**. (b) The DFWM signal for the DMF solutions of  $6 \times 10^{-5}$  M for **4**. (c) The DFWM signal for the DMF solutions of  $6 \times 10^{-5}$  M for **5**. (d) The DFWM signal for the DMF solutions of  $6 \times 10^{-5}$  M for **6**. (e) The DFWM signal for the DMF solutions of  $6 \times 10^{-5}$  M for **7** with 80 fs and 1.5 mm cell. The black solid squares are experimental data, and the red solid curves are the theoretical fit.
